# Supplementary material for: DICER-LIKE2 Plays a Crucial Role in Rice Stripe Virus Coat Protein-Mediated Virus Resistance in Arabidopsis
Source: MDPI journal article supplement (doi:10.3390/v15112239), 2023-11-10
Supplement: s1 [file s1]

Table S1. Primers sequences used for genotyping and testing the viral infection.

| Gene         | Primers                                                           | Product Size (bp) | tests      |
|--------------|-------------------------------------------------------------------|-------------------|------------|
| <i>DCL2</i>  | 5'- TGAATCATCTGGAAGAGGTGG -3'<br>5'- CTTCACAGGAGTTTTTGGCTG -3'    | 1060              | genotyping |
| <i>DCL4</i>  | 5'- TGAAGAGCATGTCAAGAAGGAG -3'<br>5'- GAGCACGACCTCTGGACTGT -3'    | 351               | genotyping |
| <i>LB1.3</i> | 5'- ATTTTGCCGATTTCGGAAC -3'                                       | -                 | genotyping |
| <i>SP</i>    | 5'-TTGTCATCATTCTTATCACACCTG-3'<br>5'-TTCTTCCACACTTTCTCATACTCTT-3' | 237               | qRT-PCR    |
| <i>EFl-a</i> | 5'-GGCTGCTGAGATGAACAA-3'<br>5'-GTGGTGGAGTCAATGATAAG-3'            | 225               | qRT-PCR    |
