# Supplementary material for: DICER-LIKE2 Plays a Crucial Role in Rice Stripe Virus Coat Protein-Mediated Virus Resistance in Arabidopsis
Source: MDPI journal article supplement (doi:10.3390/v15112239), 2023-11-10
Supplement: s1 [file s1]

Table S2. PCR products sequences for *dcl2-1* mutants genotyping.  
 Arabidopsis genome sequences were in black font and T-DNA vector sequences were in red font.

|                                                                                                                                                                                                                                                                                                                                                                                                                                                                                                                                                                                                                                                                                                                                                                                                                                                                                                                                                            |
|------------------------------------------------------------------------------------------------------------------------------------------------------------------------------------------------------------------------------------------------------------------------------------------------------------------------------------------------------------------------------------------------------------------------------------------------------------------------------------------------------------------------------------------------------------------------------------------------------------------------------------------------------------------------------------------------------------------------------------------------------------------------------------------------------------------------------------------------------------------------------------------------------------------------------------------------------------|
| <i>dcl2</i> -LP/ <i>dcl2</i> -RP PCR product sequence                                                                                                                                                                                                                                                                                                                                                                                                                                                                                                                                                                                                                                                                                                                                                                                                                                                                                                      |
| TTGTTTGCTAACATTTAGTGATTGAAGTTTCATTCATTTCTTATATTCCTCACCTCTTTTGTTCTTTTCATGTGT<br>AAATAGGTCTTAATTGGAGTGTTGCAAACATAAATGGAAATGCGGAGGCAGGTCTCCTAACTTTAAAACTG<br>TCTGCCTCATTGAGACTCTTCTTGTTATAGGTTTGGATTGCATGCACACATTTTGTGTTATGCTTATTATATTG<br>GAGTTAGATATGACGATCTGAAATGATAAACCTTGAATGTTGGACATTACTTATATCAATACATATTGGAGTAC<br>AATGGTTATTTAAATCTGTGTTGTTTTCCAGTTCTATTTCTCTGAATTTTATTGATACAGCTCCTTGAGAAC<br>ATACGGTGCATCATTTTTGTGGATAGGGTGATAACAGCCATCGTTCTGGAATCCCTTTTGCTGAGATTCTTC<br>CAACTGTAATAACTGGAAAACCAAGTACGTTGCAGGAAATAACTCTGGTCTGCAAAATCAAACCTCGGAAG<br>AAGCAAAATGAAATTGTGGAAGACTCCGGAGAGGCTTGGTATGGTCAAATTACTGTGAACTGTTGTTTTAT<br>TTGCTTACTGTTATCTTTATTTCTGAGTAACCTGTTCTGATTTCGTAGGTTAACATCATTGTAGCAACATCTATTCT<br>AGAGGAGGGTCTAGATGTTCAAAGTTGCAACCTGGTTATCAGATTGACCCTGCATCCAACATTGTCAGTTT<br>CATACAGTCTCGTGGCGTGCTAGAATGCAAAATTCAGATTATTTGATGATGGTGGAAAGGTCTGTTACATAT<br>TTGGCTGGTCTTCAGAGAGTTACGATTGTTTTGAAAACAATAGCTCCATGCTTAAAAAAAATATAATTCTTT<br>CT |
| LB1.3/ <i>dcl2</i> -LP PCR product sequence                                                                                                                                                                                                                                                                                                                                                                                                                                                                                                                                                                                                                                                                                                                                                                                                                                                                                                                |
| GTGGATCGGATTTGCGCTGCTGGGGCAACCAGCGTGGACCGCTTGCTGCAACTCTCTCAGGGCCAGGCGG<br>TGAAGGGCAATCAGCTGTTGCCGCTCACTGGTGAAAAGAAAAACCAACCCAGTACATTAAAAACGTCCG<br>CAATGTGTTATTAAGTTGTCTAAGCGTCAATTTGTTTACACCACAATATATCTGGAGAACATACGGTGCATCA<br>TTTTGTGGATAGGGTGATAACAGCCATCGTTCTGGAATCCCTTTTGCTGAGATTCTTCAAACCTGTAATAA<br>CTGGAACCAAGTACGTTGCAGGAAATAACTCTGGTCTGCAAAATCAAACCTCGGAAGAAGCAAAATGAAA<br>TTGTGGAAGACTCCGGAGAGGCTTGGTATGGTCAAATTACTGTGAACTGTTGTTTTATTGCTTACTGTTAT<br>CTTTATTTCTGAGTAACCTGTTCTGATTTCGTAGGTTAACATCATTGTAGCAACATCTATTCTAGAGGAGGGTCT<br>AGATGTTCAAAGTTGCAACCTGGTTATCAGATTGACCCTGCATCCAACATTGTCAGTTTCATACAGTCTCGT<br>GGGCGTGCTAGAATGCAAAATTCAGATTATTTGATGATGGTGGAAAGGTCTGTTACATATTTGGCTGGTCTTC<br>AGAGAGTTTACGATTGTTTTGAAAACAATAGCTCCATGCTTAAAAAAAATATAATTCTTTCTCACTCATTGCC<br>ACTGGCAGCGGAGATCTGTTAACACAATCTCGATTAATGAAATATCTTCTGGTGGGAAAAGAATGCGCGAA<br>GAGTCTTTGGATCATTCTCTGTTCCCTGTCCACCTCTCCAGATGATTCA                                          |
| LB1.3/ <i>dcl2</i> -RP PCR product sequence                                                                                                                                                                                                                                                                                                                                                                                                                                                                                                                                                                                                                                                                                                                                                                                                                                                                                                                |
| CTTACAGGAGTTTTTGCTGAGATACCTCAAGGTGGTTTTTTGTTTGCTAACATTTAGTGATTGAAGTTTCA<br>TTCATTTCTTATATTCCTCACCTCTTTTGTTCTTTTCATGTGTAAATAGGTCTTAATTGGAGTGTTGCAAACATA<br>AATGGAAATGCGGAGGCAGGTCTCCTAACTTTAAAACTGTCTGCCTCATTGAGACTCTTCTTGTTATAGGT<br>TTGGATTGCATGCACACATTTTGTGTTATGCTTATTATATTGGAGTTAGATATGACGATCTGAAATGATAAACCT<br>TGAATGTTGGACATTACTTATATCAATACATATTGGAGTACAATGGTTATTTAAATCTGTGTTGTTTTCCAGTT<br>CTATTTCTCTGAATTTTATTGTGGTGTAACAAATTAAGGGAGAATTAAGGGATATATTGTGGCTAAGCAAAT<br>ACTATTAACGTAAACTATCAGTATATATTGCGCCTCAGGATATATTGTGGTGTAACAAATTGACGCTTAGA<br>CAACTTAATAACACATTGCGGACGTTTTTAATGTACTGGGGTGGTTTTCTTTTACCAGTGAGACGGGCAA<br>CAGCTGATTGCCCTTACCGCCTGGCCCTGAGAGAGTTGCAGCAAGCGGTCCACGCTGGTTTGCCCCAGCA<br>GGCGAAAATCCTGTTTGATGGTGGTTCCGAATCCGGCAAAAT                                                                                                                                                                                                    |
